# Supplementary material for: cAMP levels regulate macrophage alternative activation marker expression
Source: PubMed Central journal article supplement — Innate Immun. 2020 Nov 26;27(2):133–42. doi: 10.1177/1753425920975082 (PMC7882807; doi:10.1177/1753425920975082), 2020-11-26
Supplement: sj-pdf-1-ini-10.1177_1753425920975082.pdf [file sj-pdf-1-ini-10.1177_1753425920975082.pdf]

# Supplemental Material

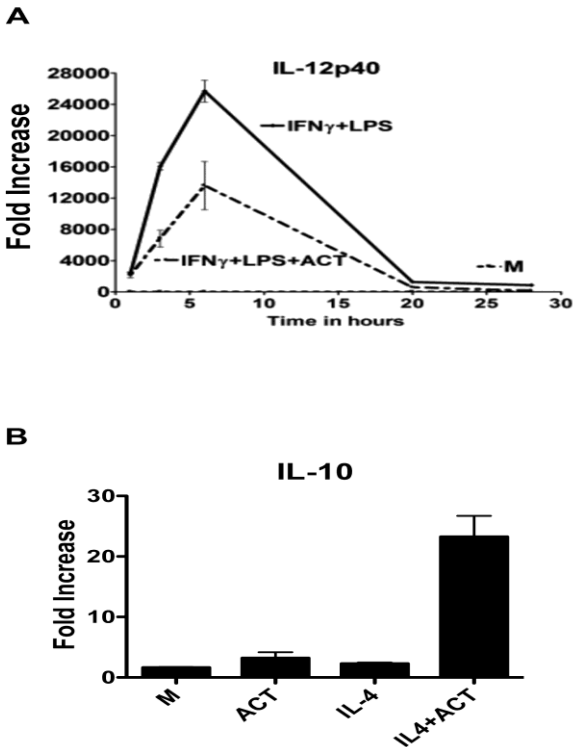

**Supplemental Figure 1.** cAMP regulates induction of IL-12 p40 and IL-10 by LPS and IL-4. (A) Peritoneal macrophages were stimulated with *E. coli* LPS (10 ng/ml) and rIFN- $\gamma$  (100U) in the absence or presence of ACT (10 nM) for the indicated time intervals and mRNA was measured by qRT-PCR for IL-12p40. (B) Peritoneal macrophages were stimulated with rIL-4 (40 ng/ml) alone, ACT alone, or rIL-4+ACT for 6 h and mRNA was measured by qRT-PCR.
